# Supplementary material for: Development of a New Extraction Method for Pomegranate and Metabolite Profiling by a LC-MS and 1H NMR Combined Approach
Source: MDPI journal article supplement (doi:10.3390/foods13101429), 2024-05-07
Supplement: s1 [file s1]

## Supplementary Materials

### Development of a New Extraction Method for Pomegranate and Metabolite Profiling by a LC-MS and $^1\text{H}$ NMR Combined Approach

#### *S1. $^1\text{H}$ -NMR Analysis and Data Processing parameters*

| Number of transients | Dummy Scans | Data Points | Relaxation Delay |
|----------------------|-------------|-------------|------------------|
| 80                   | 4           | 64k         | 5s               |

The collected spectra were automatically Fourier transformed using an exponential window with a line broadening of 0.5 Hz. Phase and baseline correction were performed using Chenomx NMR Suite 9.0 (Chenomx Inc., AB, Canada).

#### *S2. Determination of Total Phenolic Content*

The total phenolic content of the juice and extracts was determined using the Folin-Ciocalteu assay. As a standard reference, gallic acid was used. For the calibration curve, 30, 40, 50, 100, 200, 400, 600 and 800  $\mu\text{g/mL}$  solutions of gallic acid were prepared and submitted to the assay following the same procedure used for the extracts. For gallic acid, the calibration equation was  $y = 0.002x + 0.0168$  ( $R^2 = 0.995$ ). All the experiments were performed in triplicate, and results were expressed as mean of gallic acid equivalents for gram of extract (GAE mg/g).

#### *S3. Determination of Total Flavonoid Content*

The total flavonoid content was measured using the Allumine Chloride colorimetric assay using rutin as a standard. A known volume of extract (1 mg/mL) was placed in a 10 mL volumetric flask.

Distilled water (5 mL) and a solution of  $\text{NaNO}_2$  (1:20) (0.3 mL) were added. A solution of  $\text{AlCl}_3$  (1:10) (3 mL) was added 5 min later. After 6 min,  $\text{NaOH}$  (1 M) (2 mL) and distilled water up to 10 mL were added. The solutions were mixed well, and the absorbance was measured against the blank control at 510 nm on a UV-visible spectrophotometer. Rutin was used as the standard for a calibration curve ( $y = 0.0004x + 0.0554$ ,  $R^2 = 0.985$ ). The content of flavonoids in the various extracts was expressed in rutin equivalents (RE).
